# Supplementary material for: Comprehensive Analysis and Risk Identification of Pulmonary Cryptococcosis in Non-HIV Patients
Source: MDPI journal article supplement (doi:10.3390/jof7080657), 2021-08-13
Supplement: s1 [file s1]

Supplementary Supplementary

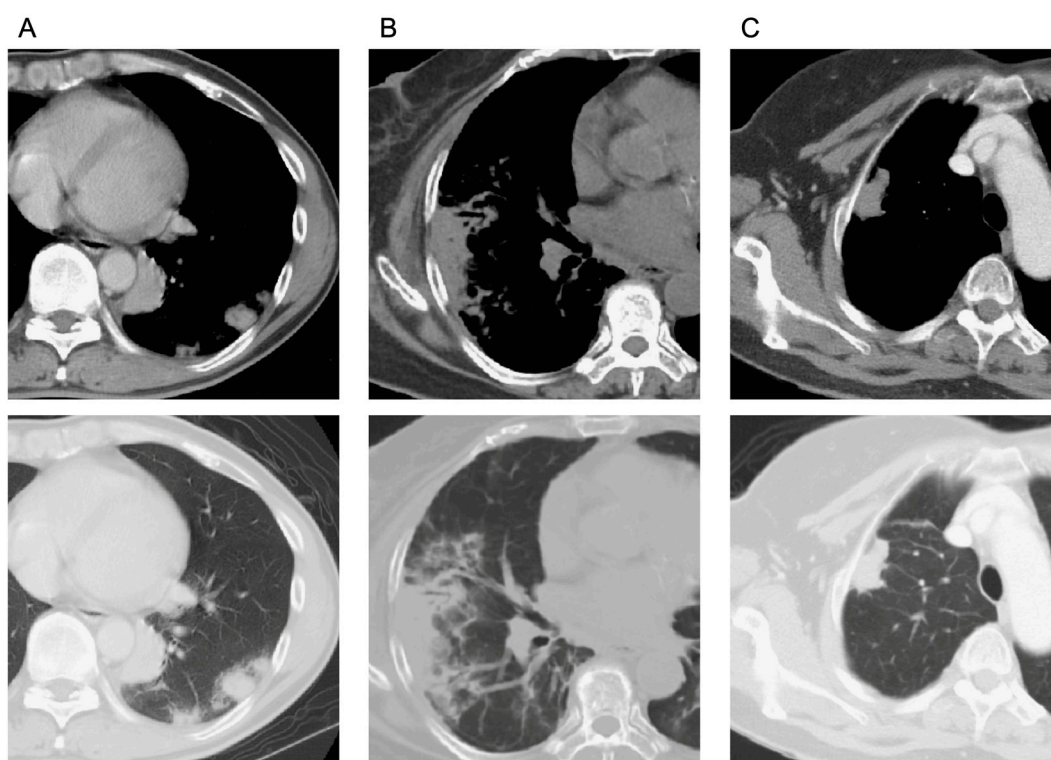

**Figure S1.** Common computed tomography findings of pulmonary cryptococcosis: multiple nodules/masses with or without cavitation (A), consolidation (B), and solitary nodule/mass with or without cavitation (C).

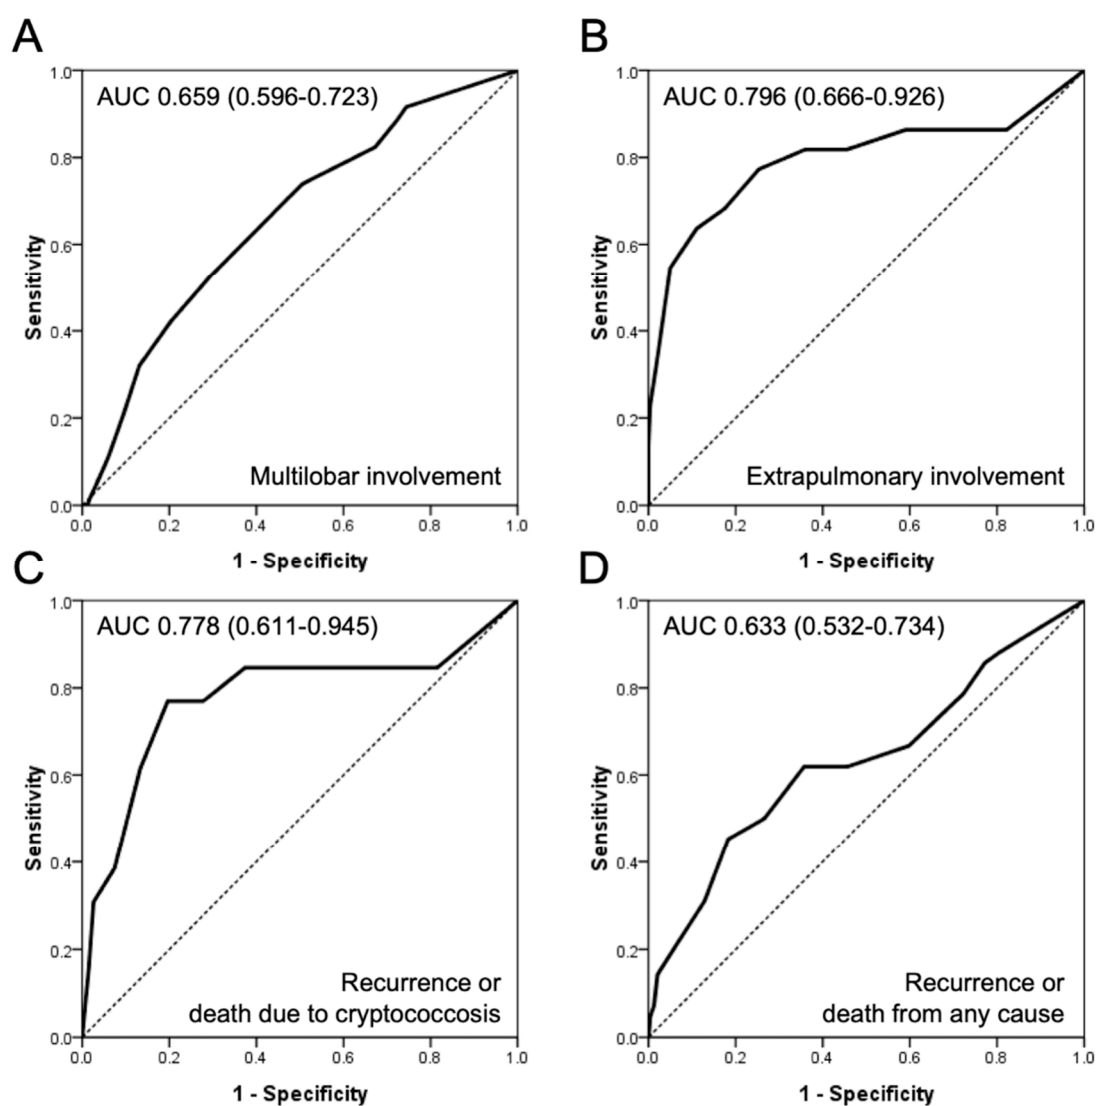

**Figure S2.** Receiver-operating characteristic (ROC) curve for evaluating Latex agglutination test of blood in predicting the extent of disease and outcome.
